# Supplementary material
Source: PubMed Central journal article supplement (PMC5206751)
Supplement: NIHMS824406-supplement-Appendix_A.pdf [file NIHMS824406-supplement-Appendix_A.pdf]

## Appendix A: Full-text Awardee Survey Questions

### Engaging, recruiting, and enrolling vaccine providers:

#### 2013 H7N9 Needs Assessment

Who would manage the process of enrolling and registering health care providers and facilities interested in serving as pandemic vaccine providers? (check one)

- State health department
- Local health departments
- Regional health departments
- Joint activity between state health department and local/regional health departments
- Other

Does your jurisdiction have a list of health care providers and facilities that have practice locations in your jurisdiction that could potentially be recruited as H7N9 vaccine providers? [Note: this would represent the overall number (i.e., denominator) of providers and facilities in your jurisdiction, not just those that have expressed interest in becoming pandemic influenza vaccine providers or those who were enrolled and registered as H1N1 vaccine providers]

- Yes
- No
- No, because maintaining such lists is the responsibility of our local health departments

If YES to having a list of potential vaccine providers and facilities in your jurisdiction: Please indicate whether the following types of providers and facilities are included in your list.

- Pharmacies
  - Yes
  - No
  - Don't Know

Does your jurisdiction have a formal or written process for recruiting the following types of healthcare providers and facilities to administer a pandemic vaccine?

- Pharmacists
  - Yes
  - No
  - Don't Know

#### 2015 PIRA

Which entity within your jurisdiction would have primary responsibility for activities related to registering and enrolling healthcare providers and facilities to become pandemic influenza vaccine providers?

- Awardee health department
- Local health department(s)
- Regional health department(s)

Other

2014 Annual Report

Have you identified points of contact for pharmacy partners in your jurisdiction, such as with state or local pharmacy boards, pharmacy associations, national pharmacy chains operating in your jurisdiction, retail stores that include immunizing pharmacists, and independent pharmacies?

Yes, we have identified points of contact for all pharmacy partners in our jurisdiction

We have identified points of contact for more than half, but not all, pharmacy partners in our jurisdiction

We have identified points of contact for less than half of the pharmacy partners in our jurisdiction

We have not identified any points of contact for any pharmacy partners in our jurisdiction

**Vaccine allocation and distribution planning;**

2012 Annual Report

Do your current pandemic vaccine distribution plans include pharmacies and retail based clinics as vaccine providers:

Early in a pandemic response

Later in a pandemic response

Our immunization program does not have current plans for including pharmacies and retail based clinics as vaccine providers

2013 H7N9 Needs Assessment

If a pandemic vaccination program were initiated, to which location(s) or types of providers would your jurisdiction request pandemic vaccine be shipped from CDC's centralized distribution contractor?

Pharmacies

Yes

No

Don't Know

If YES to having a list of potential vaccine providers and facilities in your jurisdiction: Which of the following types of information do you have about most or all of the providers and facilities on your list?

Estimated number of patients served

Patient population served (e.g. pregnant women, adults plus children, children only, adults only)

Occupational groups served (e.g. first responders, healthcare workers, other critical infrastructure)

Vaccine storage and handling capacity

Physical location address

Phone numbers  
Email addresses  
Fax numbers

### 2014 Annual Report

If you have a formal relationship or agreement with pharmacies to provide pandemic vaccinations during a response, we would like to learn how you will maximize the current distribution capacity of these chain pharmacies or retail stores during a pandemic. Does your jurisdiction's plan allow pharmacies to allocate and distribute to individual stores using their existing distribution and management infrastructure

- Yes
- We have not discussed this
- It depends on vaccine supply and availability
- Other
- If other, please describe

### 2015 PIRA

Does your jurisdiction plan to provide more than 20% of your vaccine allocation through PODs?

- Yes
- No

Based on your pandemic plan and knowledge about your jurisdiction, please estimate the proportion of your jurisdiction's weekly vaccine allocation that you plan to allocate to each of the following type of provider group or venue when there is ample vaccine supply.

- Closed Points of dispensing (PODs)
- Open Points of dispensing (PODs)
- School-located vaccination Clinics (SLVs)
- Providers already enrolled as Vaccines for Children (VFC) providers
- Non-VFC pediatric providers
- Non-VFC adult providers
- Community Vaccinators such as visiting nurses associations
- Large retail-based or grocery stores
- Large national or regional chain pharmacies
- Independent, local pharmacies
- Local health departments (LHDs)
- Other

### **Policy, formal agreements, and memoranda of understanding.**

### 2013 Annual Report

Does your program provide support to regional or local health department programs to develop Memorandums of Agreement with groups that would provide vaccination services to critical infrastructure personnel that may be prioritized for vaccine in a pandemic?

Yes

No

Don't Know

Comment

If yes, please briefly describe your program support in this effort:

If no or don't know, please provide a reason:

### 2014 Annual Report

Though it is likely that all pandemic vaccines and constituent products would be provided by the Federal government at no charge during a pandemic, some providers may also bill patients for vaccine administration fees. We'd like to learn about what guidance pharmacies have been given regarding providing vaccination services to uninsured and underinsured groups during a future pandemic.

Regarding uninsured and underinsured patients during a pandemic, pharmacists have been instructed to:

Refer these patients to the public health department for pandemic vaccination

Provide Pandemic vaccinations to all customers/patients regardless of insurance status or ability to pay for administration fees

This topic has not yet been clarified

Other

If Other, please describe

Does your jurisdiction, either directly through the immunization program or through the public health preparedness program, have or provide support to local or regional public health programs to establish formalized relationships or Memorandums of Agreement/ Understanding (MOA/U) with pharmacies to distribute and administer pandemic vaccine during a pandemic, outside of the general provider agreement?

Yes, we have such agreement in place for all pharmacy groups in our jurisdiction

Yes, we have such agreement in place for more than half, but not all, of pharmacy groups in our jurisdiction

Yes, we have such agreement in place for less than half of pharmacy groups in our jurisdiction

We have no such agreements in place with pharmacies in our jurisdiction

Don't Know
